# Supplementary material
Source: MDPI journal article supplement (https://www.mdpi.com/2673-3951/3/1/1)
Supplement: s1 [file s1]

## Article

# Error Distribution Model to Standardize LPUE, CPUE and Survey-Derived Catch Rates of Target and Non-Target Species

Régis Santos<sup>1,2\*</sup>, Osman Crespo<sup>1,2</sup>, Wendell Medeiros-Leal<sup>1,2</sup>, Ana Novoa-Pabon<sup>1</sup> and Mário Pinho<sup>1,2</sup>

<sup>1</sup>Okeanos-UAc Instituto de Investigação em Ciências do Mar, Universidade dos Açores. Rua Prof. Dr. Frederico Machado, 4, 9900-138 – Horta, Faial, Portugal.

<sup>2</sup>IMAR Instituto do Mar, Departamento de Oceanografia e Pescas, Universidade dos Açores. Rua Prof. Dr. Frederico Machado, 4, 9901-862 – Horta, Faial, Portugal.

\* Correspondence: regisvinicius@gmail.com, Tel. (+351) 292 200 469

**Table S4.** Analyses of alternative hurdle–lognormal GLMM formulations for thornback ray *Raja clavata* (RJC), blackbelly rosefish *Helicolenus dactylopterus* (BRF), and common mora *Mora moro* (RIB) catch rates (LPUE, CPUE and RPN). Likelihood ratio tests the difference of –2 Restricted Maximum log likelihood (–2 REML) between two nested models. AIC: Akaike’s information criterion; BIC: Bayesian information criterion; LRT: Likelihood ratio test.

| LPUE (kg landing <sup>-1</sup> vessel <sup>-1</sup> ) |        |        |        |      |         | CPUE (kg days at sea <sup>-1</sup> vessel <sup>-1</sup> ) |         |         |         |               | RPN (ind. 10 <sup>-3</sup> hooks)                |        |        |        |              |
|-------------------------------------------------------|--------|--------|--------|------|---------|-----------------------------------------------------------|---------|---------|---------|---------------|--------------------------------------------------|--------|--------|--------|--------------|
| RJC                                                   |        |        |        |      |         | RJC                                                       |         |         |         |               | RJC                                              |        |        |        |              |
| –2 REML                                               | AIC    | BIC    | LRT    |      |         | –2 REML                                                   | AIC     | BIC     | LRT     |               | –2 REML                                          | AIC    | BIC    | LRT    |              |
| <b>Binomial (proportion of positive catches)</b>      |        |        |        |      |         | <b>Binomial (proportion of positive catches)</b>          |         |         |         |               | <b>Binomial (proportion of positive catches)</b> |        |        |        |              |
| Year Métier Vessel                                    | 2119.6 | 2213.6 | 2509.7 |      |         | Year Vessel Gear Target                                   | 18369.1 | 18445.1 | 18762.7 |               | Year Area                                        | 4656.7 | 4712.7 | 4910.5 |              |
| Year Métier Vessel Year × Vessel *                    | 2111.4 | 2207.4 | 2509.8 | 8.2  | 0.004   | Year Vessel Gear Target Year × Gear *                     | 18194.2 | 18272.2 | 18598.1 | 174.9 < 0.001 | Year Area Year × Area *                          | 4646.1 | 4704.1 | 4908.9 | 10.6 0.001   |
| <b>Lognormal (positive catches)</b>                   |        |        |        |      |         | <b>Lognormal (positive catches)</b>                       |         |         |         |               | <b>Lognormal (positive catches)</b>              |        |        |        |              |
| Year Vessel Métier *                                  | 4666.7 | 4760.7 | 5007.8 |      |         | Year Vessel Gear Target Quarter *                         | 12435.7 | 12517.7 | 12779.3 |               | Year Area Depth Month Moon *                     | 1953.3 | 2047.3 | 2259.4 |              |
| Year Vessel Métier Year × Vessel                      | 4728.8 | 4824.8 | 5077.2 | 62.1 | < 0.001 | Year Vessel Gear Target Quarter Year × Quarter            | 12537.5 | 12621.5 | 12889.5 | 101.8 < 0.001 | Year Area Depth Month Moon Year × Month          | 2022.9 | 2118.9 | 2335.5 | 69.6 < 0.001 |

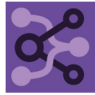

| LPUE (kg landing <sup>-1</sup> vessel <sup>-1</sup> ) |        |        |        |      |         |  | CPUE (kg days at sea <sup>-1</sup> vessel <sup>-1</sup> ) |         |         |         |      |         |  | RPN (ind. 10 <sup>-3</sup> hooks)                                                                     |         |         |         |       |         |
|-------------------------------------------------------|--------|--------|--------|------|---------|--|-----------------------------------------------------------|---------|---------|---------|------|---------|--|-------------------------------------------------------------------------------------------------------|---------|---------|---------|-------|---------|
| RJC                                                   |        |        |        |      |         |  | RJC                                                       |         |         |         |      |         |  | RJC                                                                                                   |         |         |         |       |         |
| -2 REML    AIC    BIC    LRT                          |        |        |        |      |         |  | -2 REML    AIC    BIC    LRT                              |         |         |         |      |         |  | -2 REML    AIC    BIC    LRT                                                                          |         |         |         |       |         |
| Year Vessel Métier                                    | 4685.5 | 4783.5 | 5041.1 | 43.4 | < 0.001 |  | Year Vessel Gear                                          | 12471.6 | 12557.6 | 12831.9 | 65.9 | < 0.001 |  | Year Area Depth                                                                                       | 2022.1  | 2120.1  | 2341.2  | 0.8   | 0.374   |
| Year × Vessel Year × Métier                           |        |        |        |      |         |  | Target Quarter Year × Quarter Year × Vessel               |         |         |         |      |         |  | Month Moon Year × Month Year × Moon Year × Area Depth Month Moon Year × Month Year × Moon Year × Area | 2015.3  | 2115.3  | 2340.9  | 6.8   | 0.009   |
| BRF                                                   |        |        |        |      |         |  | BRF                                                       |         |         |         |      |         |  | BRF                                                                                                   |         |         |         |       |         |
| Binomial (proportion of positive catches)             |        |        |        |      |         |  | Binomial (proportion of positive catches)                 |         |         |         |      |         |  | Binomial (proportion of positive catches)                                                             |         |         |         |       |         |
| Year Métier Vessel                                    | 2654.9 | 2748.9 | 3045.0 |      |         |  | Year Gear Target *                                        | 23316.2 | 23384.2 | 23668.3 |      |         |  | Year Depth Soak time*                                                                                 | 6569.9  | 6665.9  | 6991.0  |       |         |
| Year Métier Vessel Year × Vessel                      | 2653.6 | 2749.6 | 3052.0 | 1.32 | 0.251   |  | Year Gear Target Year × Target                            | 23316.2 | 23386.2 | 23678.7 | 0.0  | 0.993   |  | Year Depth Soak time Year × Soak time                                                                 | 6569.9  | 6667.9  | 6999.8  | 0.0   | 0.997   |
| Year Métier Vessel Year × Vessel Year × Métier *      | 2565.4 | 2663.4 | 2972.1 | 88.2 | < 0.001 |  |                                                           |         |         |         |      |         |  |                                                                                                       |         |         |         |       |         |
| Lognormal (positive catches)                          |        |        |        |      |         |  | Lognormal (positive catches)                              |         |         |         |      |         |  | Lognormal (positive catches)                                                                          |         |         |         |       |         |
| Year Vessel Métier *                                  | 5560.3 | 5656.3 | 5915.9 |      |         |  | Year Vessel Gear Target *                                 | 26472.1 | 26550.1 | 26827.7 |      |         |  | Year Area Depth *                                                                                     | 10578.5 | 10676.5 | 10979.0 |       |         |
|                                                       |        |        |        |      |         |  |                                                           |         |         |         |      |         |  | Year Area Depth Year × Area                                                                           | 10660.7 | 10760.7 | 11069.4 | 82.2  | < 0.001 |
| RIB                                                   |        |        |        |      |         |  | RIB                                                       |         |         |         |      |         |  | RIB                                                                                                   |         |         |         |       |         |
| Binomial (proportion of positive catches)             |        |        |        |      |         |  | Binomial (proportion of positive catches)                 |         |         |         |      |         |  | Binomial (proportion of positive catches)                                                             |         |         |         |       |         |
| Year Métier Vessel                                    | 1060.1 | 1154.1 | 1450.2 |      |         |  | Year Vessel Gear Depth Target *                           | 6583.2  | 6663.2  | 6993.6  |      |         |  | Year Depth Area                                                                                       | 4296.9  | 4398.9  | 4759.0  |       |         |
| Year Métier Vessel Year × Vessel                      | 1057.5 | 1153.5 | 1455.9 | 2.5  | 0.111   |  |                                                           |         |         |         |      |         |  | Year Depth Area Year × Area*                                                                          | 4117.7  | 4221.7  | 4588.9  | 179.2 | < 0.001 |
| Year Métier Vessel Year × Vessel Year × Métier *      | 1002.7 | 1100.7 | 1409.4 | 54.9 | < 0.001 |  |                                                           |         |         |         |      |         |  |                                                                                                       |         |         |         |       |         |
| Lognormal (positive catches)                          |        |        |        |      |         |  | Lognormal (positive catches)                              |         |         |         |      |         |  | Lognormal (positive catches)                                                                          |         |         |         |       |         |
| Year Vessel Métier                                    | 2137.5 | 2211.5 | 2370.6 |      |         |  | Year Vessel Depth Target *                                | 5944.6  | 6014.6  | 6206.5  |      |         |  | Year Area Depth Moon*                                                                                 | 4414.7  | 4514.7  | 4785.2  |       |         |

| LPUE (kg landing <sup>-1</sup> vessel <sup>-1</sup> ) |        |         |        |        |        |      | CPUE (kg days at sea <sup>-1</sup> vessel <sup>-1</sup> ) |                             |         |       |        |        |        | RPN (ind. 10 <sup>-3</sup> hooks) |         |                         |      |       |        |        |        |      |         |
|-------------------------------------------------------|--------|---------|--------|--------|--------|------|-----------------------------------------------------------|-----------------------------|---------|-------|--------|--------|--------|-----------------------------------|---------|-------------------------|------|-------|--------|--------|--------|------|---------|
| RJC                                                   |        |         |        |        |        |      | RJC                                                       |                             |         |       |        |        |        | RJC                               |         |                         |      |       |        |        |        |      |         |
|                                                       |        | -2 REML | AIC    | BIC    | LRT    |      |                                                           |                             | -2 REML | AIC   | BIC    | LRT    |        |                                   |         | -2 REML                 | AIC  | BIC   | LRT    |        |        |      |         |
| Year                                                  | Vessel | Métier  | 2125.1 | 2201.1 | 2364.5 | 12.4 | < 0.001                                                   | Year                        | Vessel  | Depth | 5968.6 | 6040.6 | 6237.9 | 24.0                              | < 0.001 | Year                    | Area | Depth | 4507.4 | 4609.4 | 4885.4 | 92.7 | < 0.001 |
| <i>Year × Vessel</i>                                  |        |         |        |        |        |      |                                                           | <i>Target Year × Vessel</i> |         |       |        |        |        |                                   |         | <i>Moon Year × Moon</i> |      |       |        |        |        |      |         |
| Year                                                  | Vessel | Métier  |        |        |        |      |                                                           | Year                        | Vessel  | Depth |        |        |        |                                   |         | Year                    | Area | Depth |        |        |        |      |         |
| <i>Year × Vessel</i>                                  |        |         | 2067.9 | 2145.9 | 2313.6 | 57.2 | < 0.001                                                   | <i>Year × Vessel</i>        |         |       |        |        |        |                                   |         | <i>Moon Year × Moon</i> |      |       | 4474.2 | 4578.2 | 4859.6 | 33.2 | < 0.001 |
| <i>Métier *</i>                                       |        |         |        |        |        |      |                                                           | <i>Métier *</i>             |         |       |        |        |        |                                   |         | <i>Year × Area</i>      |      |       |        |        |        |      |         |

The factors in normal typeface are treated as fixed effects and those in italics are random interactions. \* the best fitted model.
