# Supplementary material
Source: MDPI journal article supplement (https://www.mdpi.com/2673-3951/3/1/1)

# Article

## Error Distribution Model to Standardize LPUE, CPUE and Survey-Derived Catch Rates of Target and Non-Target Species

Régis Santos<sup>1,2\*</sup>, Osman Crespo<sup>1,2</sup>, Wendell Medeiros-Leal<sup>1,2</sup>, Ana Novoa-Pabon<sup>1</sup> and Mário Pinho<sup>1,2</sup>

<sup>1</sup>Okeanos-UAc Instituto de Investigação em Ciências do Mar, Universidade dos Açores. Rua Prof. Dr. Frederico Machado, 4, 9900-138 – Horta, Faial, Portugal.

<sup>2</sup>IMAR Instituto do Mar, Departamento de Oceanografia e Pescas, Universidade dos Açores. Rua Prof. Dr. Frederico Machado, 4, 9901-862 – Horta, Faial, Portugal.

\* Correspondence: regisvinicius@gmail.com, Tel. (+351) 292 200 469

**Figure S2.** Diagnostic plot to check the assumed error distribution in generalized linear models: standardized deviance residuals plotted versus the estimated linear predictor ( $\eta$ ) for thornback ray *Raja clavata* (RJC), blackbelly rosefish *Helicolenus dactylopterus* (BRF), and common mora *Mora moro* (RIB). The null pattern is a distribution of residuals with mean zero and constant variance. The red line is the loess smoother through the plotted values. A: LPUE (kg landing<sup>-1</sup> vessel<sup>-1</sup>); B: CPUE (kg days at sea<sup>-1</sup> vessel<sup>-1</sup>); C: RPN (ind. 10<sup>-3</sup> hooks).

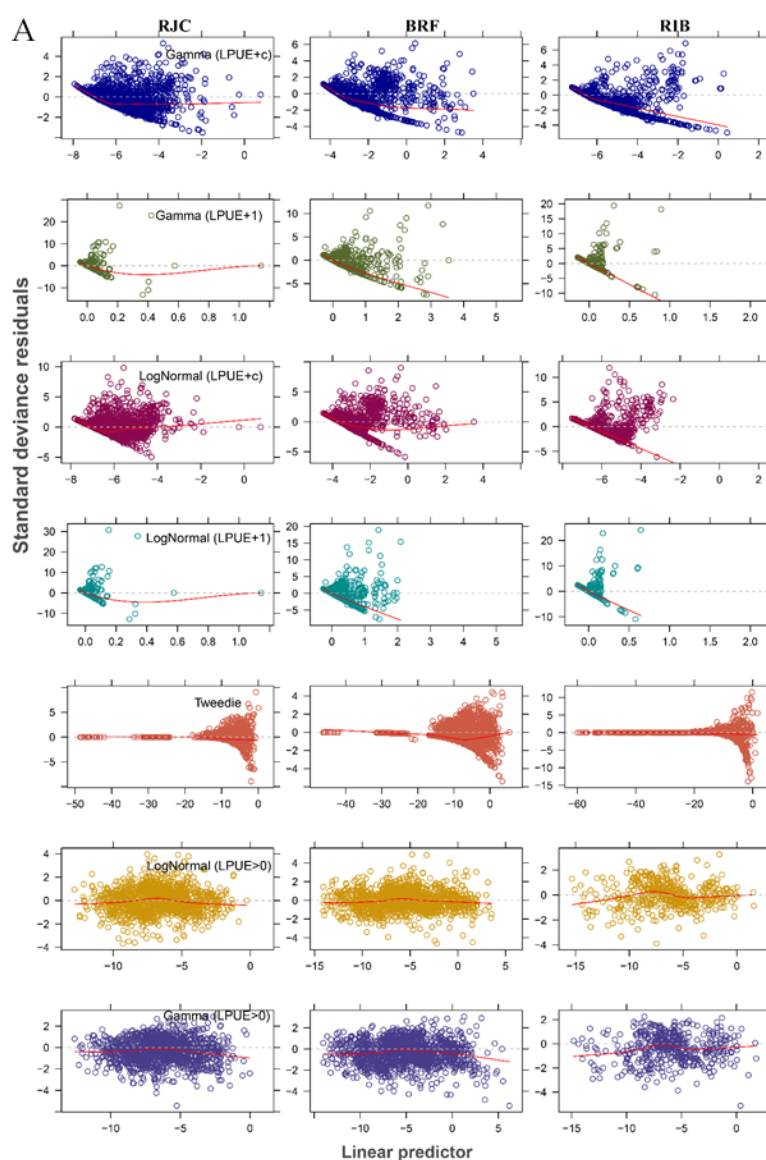

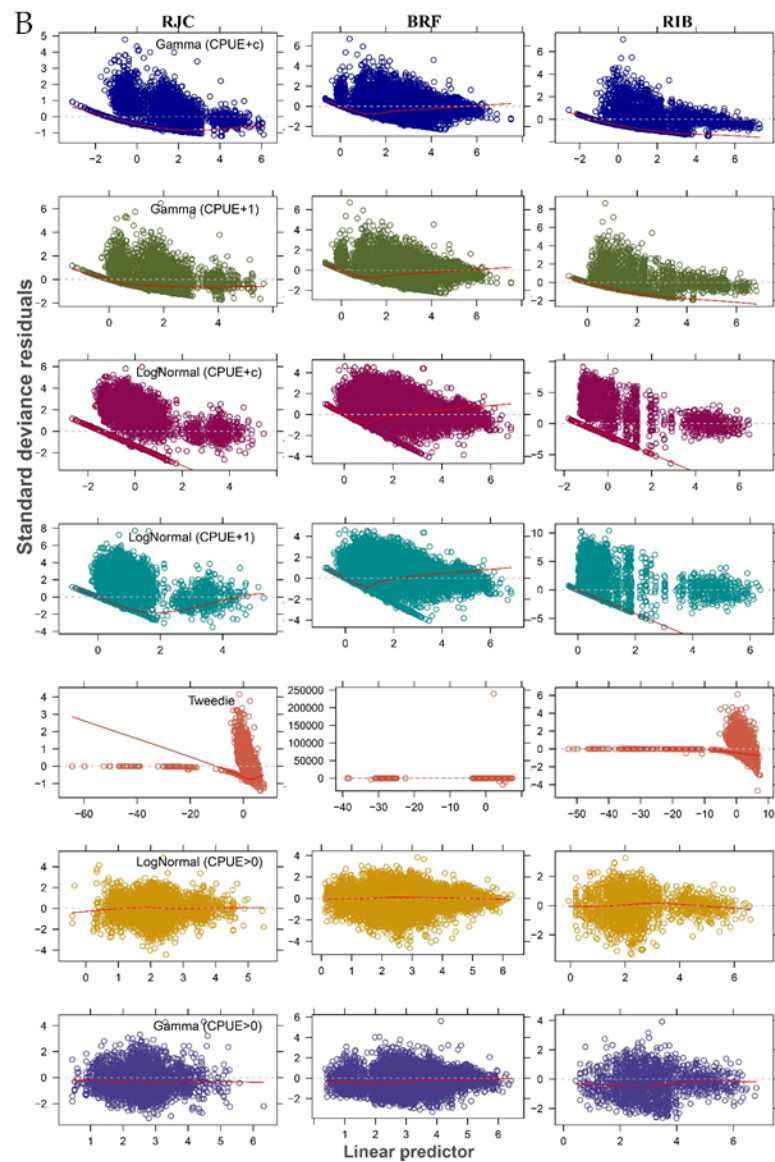

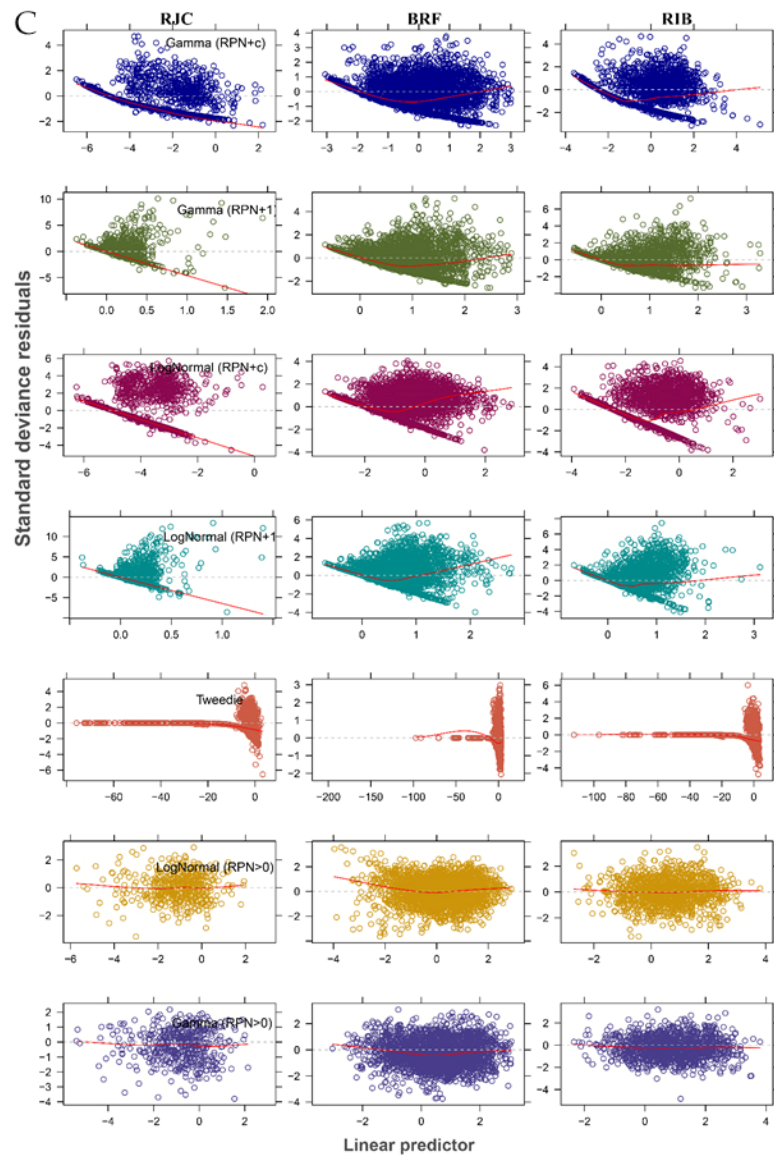

Supplement: s1 [file s1]
