# Supplementary material
Source: MDPI journal article supplement (https://www.mdpi.com/2673-3951/3/1/1)
Supplement: s1 [file s1]

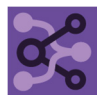

|                                                         |          |          |          |        |         |                                 |          |          |          |                                                   |           |         |         |               |
|---------------------------------------------------------|----------|----------|----------|--------|---------|---------------------------------|----------|----------|----------|---------------------------------------------------|-----------|---------|---------|---------------|
| <b>Gamma (catch + 1)</b>                                |          |          |          |        |         | <b>Gamma (catch + 1)</b>        |          |          |          | <b>Gamma (catch + 1)</b>                          |           |         |         |               |
| Year Vessel Métier Target Quarter                       | -14522.3 | -14420.3 | -14099.0 |        |         | Year Vessel Gear Target *       | 106091.6 | 106169.6 | 106495.5 | Year Area Depth Moon Soak time                    | -2524.0   | -2402.0 | -1987.8 |               |
| Year Vessel Métier Target Quarter <i>Year × Quarter</i> | -14545.5 | -14441.5 | -14113.9 | 23.2   | < 0.001 |                                 |          |          |          | Year Area Depth Moon Soak time <i>Year × Moon</i> | -2697.5   | -2573.5 | -2152.5 | 173.5 < 0.001 |
| Year Vessel Métier Target Quarter <i>Year × Quarter</i> | -16179.5 | -16073.5 | -15739.6 | 1634.1 | < 0.001 |                                 |          |          |          | Year Area Depth Moon Soak time <i>Year × Moon</i> | -3241.1   | -3115.1 | -2687.3 | 543.7 < 0.001 |
| <i>Year × Vessel</i>                                    |          |          |          |        |         |                                 |          |          |          | <i>Year × Area</i>                                |           |         |         |               |
| Year Vessel Métier Target Quarter <i>Year × Quarter</i> | -16257.7 | -16149.7 | -15809.5 | 78.2   | < 0.001 |                                 |          |          |          | Year Area Depth Moon Soak time <i>Year × Moon</i> | -3391.418 | -3263.4 | -2828.8 | 150.3 < 0.001 |
| <i>Year × Vessel Year × Métier</i>                      |          |          |          |        |         |                                 |          |          |          | <i>Year × Area Year × Soak time*</i>              |           |         |         |               |
|                                                         | BRF      |          |          |        |         |                                 | BRF      |          |          |                                                   | BRF       |         |         |               |
| <b>Gamma (catch + c)</b>                                |          |          |          |        |         | <b>Gamma (catch + c)</b>        |          |          |          | <b>Gamma (catch + c)</b>                          |           |         |         |               |
| Year Vessel *                                           | -14584.1 | -14504.1 | -14251.3 |        |         | Year Vessel Gear Depth Target * | 137653.6 | 137727.6 | 138033.2 | Year Area Depth                                   | 11659.8   | 11763.8 | 12131.1 |               |
|                                                         |          |          |          |        |         |                                 |          |          |          | Year Area Depth <i>Year × Area *</i>              | 11240.0   | 11346.0 | 11720.3 | 419.8 < 0.001 |
| <b>Gamma (catch + 1)</b>                                |          |          |          |        |         | <b>Gamma (catch + 1)</b>        |          |          |          | <b>Gamma (catch + 1)</b>                          |           |         |         |               |
| Year Vessel Target                                      | 3116.6   | 3202.6   | 3474.3   |        |         | Year Vessel Gear Depth Target * | 136512.9 | 136586.9 | 136892.5 | Year Area Depth                                   | 25172.8   | 25276.8 | 25644.0 |               |
| Year Vessel Target <i>Year × Vessel *</i>               | 1261.7   | 1349.6   | 1627.7   | 1854.9 | < 0.001 |                                 |          |          |          | Year Area Depth <i>Year × Area *</i>              | 24488.1   | 24594.1 | 24968.5 | 684.6 < 0.001 |
|                                                         | RIB      |          |          |        |         |                                 | RIB      |          |          |                                                   | RIB       |         |         |               |
| <b>Gamma (catch + c)</b>                                |          |          |          |        |         | <b>Gamma (catch + c)</b>        |          |          |          | <b>Gamma (catch + c)</b>                          |           |         |         |               |
| Year Quarter Vessel Métier                              | -37927.6 | -37825.6 | -37504.3 |        |         | Year Vessel Gear Target *       | 30222.3  | 30300.3  | 30626.2  | Year Area Depth*                                  | -4673.5   | -4569.5 | -4202.3 |               |
| Year Quarter Vessel Métier <i>Year × Vessel *</i>       | -40564.0 | -40460.0 | -40132.4 | 2636.4 | < 0.001 |                                 |          |          |          |                                                   |           |         |         |               |
| <b>Gamma (catch + 1)</b>                                |          |          |          |        |         | <b>Gamma (catch + 1)</b>        |          |          |          | <b>Gamma (catch + 1)</b>                          |           |         |         |               |
| Year Vessel Target                                      | -9242.9  | -9156.9  | -8885.2  |        |         | Year Vessel Gear Depth Target * | 72962.3  | 73044.3  | 73382.9  | Year Area Depth                                   | 18432.9   | 18536.9 | 18904.1 |               |
| Year Vessel Target <i>Year × Vessel *</i>               | -10402.9 | -10314.9 | -10036.9 | 1160.0 | < 0.001 |                                 |          |          |          | Year Area Depth <i>Year × Area *</i>              | 17847.5   | 17953.5 | 18327.8 | 585.4 < 0.001 |

The factors in normal typeface are treated as fixed effects and those in italics are random interactions.

c: 10% of the mean catch rate; \* the best fitted model.

## B. Lognormal

|                       | LPUE (kg landing <sup>-1</sup> vessel <sup>-1</sup> ) |     |     |  |                       | CPUE (kg days at sea <sup>-1</sup> vessel <sup>-1</sup> ) |     |     |  |                       | RPN (ind. 10 <sup>-3</sup> hooks) |     |     |  |
|-----------------------|-------------------------------------------------------|-----|-----|--|-----------------------|-----------------------------------------------------------|-----|-----|--|-----------------------|-----------------------------------|-----|-----|--|
|                       | RJC                                                   |     |     |  |                       | RJC                                                       |     |     |  |                       | RJC                               |     |     |  |
|                       | - 2 REM<br>log<br>likelihoo<br>d                      |     |     |  |                       | - 2 REM<br>log<br>likeliho<br>od                          |     |     |  |                       | - 2 REM<br>log<br>likelihoo<br>d  |     |     |  |
|                       | AIC                                                   | BIC | LRT |  |                       | AIC                                                       | BIC | LRT |  |                       | AIC                               | BIC | LRT |  |
| Lognormal (catch + c) |                                                       |     |     |  | Lognormal (catch + c) |                                                           |     |     |  | Lognormal (catch + c) |                                   |     |     |  |



|                                                                   |          |          |          |       |         |                                                         |         |         |         |        |         |                                                                                   |           |         |         |       |         |
|-------------------------------------------------------------------|----------|----------|----------|-------|---------|---------------------------------------------------------|---------|---------|---------|--------|---------|-----------------------------------------------------------------------------------|-----------|---------|---------|-------|---------|
| Year Vessel Métier *                                              | 8743.5   | 8839.5   | 9141.9   |       |         | Year Vessel Gear Target                                 | 94046.0 | 94124.0 | 94449.9 |        |         | Year Area Depth*                                                                  | 24258.7   | 24362.7 | 24729.9 |       |         |
| Year Vessel Métier<br><i>Year × Vessel</i>                        | 8860.4   | 8958.4   | 9267.1   | 116.9 | < 0.001 | Year Vessel Gear Target<br><i>Year × Vessel *</i>       | 93428.4 | 93508.4 | 93842.7 | 617.6  | < 0.001 | Year Area Depth<br><i>Year × Area</i>                                             | 24398.6   | 24504.6 | 24878.9 | 139.9 | < 0.001 |
| Year Vessel Métier<br><i>Year × Vessel Year × Métier</i>          | 8782.0   | 8882.0   | 9197.0   | 78.4  | < 0.001 |                                                         |         |         |         |        |         |                                                                                   |           |         |         |       |         |
| Lognormal (catch + 1)                                             |          |          |          |       |         | Lognormal (catch + 1)                                   |         |         |         |        |         | Lognormal (catch + 1)                                                             |           |         |         |       |         |
| Year Vessel Métier Target                                         | -15851.1 | -15753.1 | -15444.4 |       |         | Year Vessel Gear Target                                 | 68303.1 | 68381.1 | 68707.0 |        |         | Year Area Depth Moon Soak time*                                                   | -5256.7   | -5134.7 | -4720.5 |       |         |
| Year Vessel Métier Target<br><i>Year × Vessel *</i>               | -16582.0 | -16482.0 | -16167.0 | 730.9 | < 0.001 | Year Vessel Gear Target<br><i>Year × Vessel *</i>       | 67789.9 | 67869.9 | 68204.1 | 513.3  | < 0.001 | Year Area Depth Moon Soak time<br><i>Year × Moon</i>                              | -4825.7   | -4701.7 | -4280.7 | 431.0 | < 0.001 |
| Year Vessel Métier Target<br><i>Year × Vessel Year × Métier</i>   | -16582.0 | -16480.0 | -16158.7 | 0.0   | 1.000   |                                                         |         |         |         |        |         | Year Area Depth Moon Soak time<br><i>Year × Moon Year × Area</i>                  | -4908.3   | -4782.3 | -4354.4 | 82.5  | < 0.001 |
|                                                                   |          |          |          |       |         |                                                         |         |         |         |        |         | Year Area Depth Moon Soak time<br><i>Year × Moon Year × Area Year × Soak time</i> | -4928.257 | -4800.3 | -4365.7 | 20.0  | < 0.001 |
|                                                                   | BRF      |          |          |       |         |                                                         | BRF     |         |         |        |         |                                                                                   | BRF       |         |         |       |         |
| Lognormal (catch + c)                                             |          |          |          |       |         | Lognormal (catch + c)                                   |         |         |         |        |         | Lognormal (catch + c)                                                             |           |         |         |       |         |
| Year Vessel Métier Target *                                       | 8311.6   | 8413.6   | 8734.9   |       |         | Year Vessel Gear Depth Target *                         | 73491.3 | 73573.3 | 73911.9 |        |         | Year Area Depth *                                                                 | 26754.7   | 26858.7 | 27225.9 |       |         |
| Year Vessel Métier Target<br><i>Year × Vessel</i>                 | 8418.7   | 8522.7   | 8850.3   | 107.1 | < 0.001 |                                                         |         |         |         |        |         | Year Area Depth<br><i>Year × Area</i>                                             | 26777.2   | 26883.2 | 27257.5 | 22.5  | < 0.001 |
| Year Vessel Métier Target<br><i>Year × Vessel Year × Métier</i>   | 8326.0   | 8432.0   | 8765.9   | 92.7  | < 0.001 |                                                         |         |         |         |        |         |                                                                                   |           |         |         |       |         |
| Lognormal (catch + 1)                                             |          |          |          |       |         | Lognormal (catch + 1)                                   |         |         |         |        |         | Lognormal (catch + 1)                                                             |           |         |         |       |         |
| Year Vessel Métier Target                                         | -548.6   | -446.6   | -125.3   |       |         | Year Vessel Gear Depth Target *                         | 74230.0 | 74312.0 | 74650.6 |        |         | Year Area Depth Moon*                                                             | 14141.6   | 14251.6 | 14635.8 |       |         |
| Year Vessel Métier Target<br><i>Year × Vessel</i>                 | -500.0   | -396.0   | -68.4    | 48.6  | < 0.001 |                                                         |         |         |         |        |         | Year Area Depth Moon<br><i>Year × Moon</i>                                        | 14365.6   | 14477.6 | 14868.8 | 224.0 | < 0.001 |
| Year Vessel Métier Target<br><i>Year × Vessel Year × Métier *</i> | -572.9   | -466.9   | -133.0   | 72.9  | < 0.001 |                                                         |         |         |         |        |         | Year Area Depth Moon<br><i>Year × Moon Year × Area</i>                            | 14158.3   | 14272.3 | 14670.4 | 207.4 | < 0.001 |
|                                                                   | RIB      |          |          |       |         |                                                         | RIB     |         |         |        |         |                                                                                   | RIB       |         |         |       |         |
| Lognormal (catch + c)                                             |          |          |          |       |         | Lognormal (catch + c)                                   |         |         |         |        |         | Lognormal (catch + c)                                                             |           |         |         |       |         |
| Year Vessel Métier Target                                         | 8588.3   | 8690.3   | 9011.6   |       |         | Year Vessel Gear Depth Target                           | 61072.9 | 61154.9 | 61493.5 |        |         | Year Depth Area                                                                   | 24886.6   | 24990.6 | 25357.8 |       |         |
| Year Vessel Métier Target<br><i>Year × Vessel</i>                 | 8494.5   | 8598.5   | 8926.1   | 93.9  | < 0.001 | Year Vessel Gear Depth Target<br><i>Year × Vessel *</i> | 59647.5 | 59731.5 | 60078.4 | 1425.4 | < 0.001 | Year Depth Area<br><i>Year × Area *</i>                                           | 24870.9   | 24976.9 | 25351.1 | 15.8  | < 0.001 |

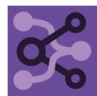

Year Vessel Métier  
 Target Year × Vessel 8084.7 8190.7 8524.6 409.7 < 0.001  
 Year × Métier \*

| Lognormal (catch + 1)                        |          |          |          |      |         | Lognormal (catch + 1)                                   |         |         |         |        | Lognormal (catch + 1) |                                    |         |         |         |      |         |
|----------------------------------------------|----------|----------|----------|------|---------|---------------------------------------------------------|---------|---------|---------|--------|-----------------------|------------------------------------|---------|---------|---------|------|---------|
| Year Vessel Target                           | -10878.4 | -10792.4 | -10520.6 |      |         | Year Vessel Gear<br>Depth Target                        | 41676.2 | 41758.2 | 42096.8 |        | Year Depth Area*      | 11839.2                            | 11943.2 | 12310.4 |         |      |         |
| Year Vessel Target<br><i>Year × Vessel *</i> | -10913.4 | -10825.4 | -10547.4 | 35.1 | < 0.001 | Year Vessel Gear<br>Depth Target <i>Year × Vessel *</i> | 40215.9 | 40299.9 | 40646.8 | 1460.3 | < 0.001               | Year Depth Area <i>Year × Area</i> | 11920.0 | 12026.0 | 12400.3 | 80.8 | < 0.001 |

The factors in normal typeface are treated as fixed effects and those in italics are random interactions.

c: 10% of the mean catch rate; \* the best fitted model.

### C. Tweedie

|                    |                                                            | LPUE (kg landing <sup>-1</sup> vessel <sup>-1</sup> ) |         |         |       |         |                                                        |          | CPUE (kg days at sea <sup>-1</sup> vessel <sup>-1</sup> ) |          |      |         |                                                              |         |         | RPN (ind. 10 <sup>-3</sup> hooks) |     |     |     |  |
|--------------------|------------------------------------------------------------|-------------------------------------------------------|---------|---------|-------|---------|--------------------------------------------------------|----------|-----------------------------------------------------------|----------|------|---------|--------------------------------------------------------------|---------|---------|-----------------------------------|-----|-----|-----|--|
|                    |                                                            | RJC                                                   |         |         |       |         |                                                        |          | RJC                                                       |          |      |         | RJC                                                          |         |         |                                   |     |     |     |  |
|                    |                                                            | - 2 REM log<br>likelihood                             | AIC     | BIC     | LRT   |         |                                                        |          | - 2 REM log<br>likelihood                                 | AIC      | BIC  | LRT     |                                                              |         |         | - 2 REM log<br>likelihood         | AIC | BIC | LRT |  |
| Year Vessel Métier | Quarter                                                    | 6023.1                                                | 6125.1  | 6456.9  |       |         | Year Vessel Gear Target                                | 61635.0  | 61713.0                                                   | 62039.1  |      |         | Year Area<br>Depth                                           | 8797.0  | 8901.0  | 9268.2                            |     |     |     |  |
| Year Vessel Métier | Quarter Year ×<br>Quarter                                  | -8856.6                                               | -8752.6 | -8425.0 | NA    | NA      | Year Vessel Gear Target Year ×<br>Vessel               | 51144.4  | 51224.0                                                   | 51559.0  | NA   | NA      | Year Area<br>Depth<br>Year ×<br>Area*                        | 4093.6  | 4199.6  | 4573.9                            | NA  | NA  |     |  |
| Year Vessel Métier | Quarter Year ×<br>Quarter Year × Vessel                    | -9035.9                                               | -8929.9 | -8596.0 | 179.3 | < 0.001 | Year Vessel Gear Target Year ×<br>Vessel Year × Gear * | 51084.6  | 51166.6                                                   | 51509.3  | 59.8 | < 0.001 |                                                              |         |         |                                   |     |     |     |  |
| Year Vessel Métier | Quarter Year ×<br>Quarter Year × Vessel Year × Métier<br>* | -9565.4                                               | -9457.4 | -9117.2 | 529.6 | < 0.001 |                                                        |          |                                                           |          |      |         |                                                              |         |         |                                   |     |     |     |  |
|                    |                                                            | BRF                                                   |         |         |       |         |                                                        |          | BRF                                                       |          |      |         |                                                              |         |         | BRF                               |     |     |     |  |
| Year Vessel Métier |                                                            | -5477.1                                               | -5381.1 | -5068.7 |       |         | Year Vessel Gear Depth Target *                        | 102446.3 | 102528.3                                                  | 102871.1 |      |         | Year Area<br>Depth *                                         | 21976.8 | 22080.8 | 22448.1                           |     |     |     |  |
| Year Vessel Métier | Year × Métier *                                            | -5811.5                                               | -5713.5 | -5404.8 | NA    | NA      |                                                        |          |                                                           |          |      |         |                                                              |         |         |                                   |     |     |     |  |
|                    |                                                            | RIB                                                   |         |         |       |         |                                                        |          | RIB                                                       |          |      |         |                                                              |         |         | RIB                               |     |     |     |  |
| Year Vessel Métier |                                                            | 8086.6                                                | 8182.6  | 8495.0  |       |         | Year Vessel Gear Depth Target *                        | 40676.5  | 40758.5                                                   | 41101.3  |      |         | Year Area<br>Depth<br>Year Area<br>Depth<br>Year ×<br>Area * | 14731.5 | 14835.5 | 15202.7                           |     |     |     |  |
| Year Vessel Métier | Year × Vessel *                                            | -2891.1                                               | -2793.1 | -2484.4 | NA    | NA      |                                                        |          |                                                           |          |      |         |                                                              | 12009.8 | 12115.8 | 12490.1                           | NA  | NA  |     |  |

The factors in normal typeface are treated as fixed effects and those in italics are random interactions.

\* the best fitted model.

### D. Hurdle–gamma

|                                                                                               | LPUE (landing <sup>-1</sup> vessel <sup>-1</sup> ) |          |          |       |         | CPUE (kg days at sea <sup>-1</sup> vessel <sup>-1</sup> )                    |         |         |         |       | RPN (ind. 10 <sup>-3</sup> hooks) |                                                                                                                 |          |         |         |       |         |
|-----------------------------------------------------------------------------------------------|----------------------------------------------------|----------|----------|-------|---------|------------------------------------------------------------------------------|---------|---------|---------|-------|-----------------------------------|-----------------------------------------------------------------------------------------------------------------|----------|---------|---------|-------|---------|
|                                                                                               | RJC                                                |          |          |       |         | RJC                                                                          |         |         |         |       | RJC                               |                                                                                                                 |          |         |         |       |         |
|                                                                                               | – 2 REM<br>log<br>likelihoo<br>d                   | AIC      | BIC      | LRT   |         | – 2 REM<br>log<br>likelihood                                                 | AIC     | BIC     | LRT     |       | – 2 REM<br>log<br>likelihood      | AIC                                                                                                             | BIC      | LRT     |         |       |         |
| Binomial<br>(proportion of<br>positive catches)                                               |                                                    |          |          |       |         | Binomial (proportion<br>of positive catches)                                 |         |         |         |       |                                   | Binomial<br>(proportion of<br>positive catches)                                                                 |          |         |         |       |         |
| Year Métier Vessel                                                                            | 2119.6                                             | 2213.6   | 2509.7   |       |         | Year Vessel Gear<br>Target                                                   | 18369.1 | 18445.1 | 18762.7 |       |                                   | Year Area                                                                                                       | 4656.7   | 4712.7  | 4910.5  |       |         |
| Year Métier Vessel<br><i>Year × Vessel *</i>                                                  | 2111.4                                             | 2207.4   | 2509.8   | 8.23  | 0.004   | Year Vessel Gear<br>Target <i>Year × Gear *</i>                              | 18194.2 | 18272.2 | 18598.1 | 174.9 | < 0.001                           | Year Area <i>Year ×<br/>Area*</i>                                                                               | 4646.1   | 4704.1  | 4908.9  | 10.6  | 0.001   |
| Gamma (positive<br>catches)                                                                   |                                                    |          |          |       |         | Gamma (positive<br>catches)                                                  |         |         |         |       |                                   | Gamma (positive<br>catches)                                                                                     |          |         |         |       |         |
| Year Vessel Métier<br>Quarter                                                                 | -14015.1                                           | -13915.1 | -13652.2 |       |         | Year Gear Target<br>Quarter Vessel                                           | 31474.0 | 31556.0 | 31817.6 |       |                                   | Year Area Depth<br>Month Moon Soak<br>time                                                                      | 336.8    | 442.76  | 670.3   |       |         |
| Year Vessel Métier<br>Quarter <i>Year ×<br/>Quarter</i>                                       | -14020.4                                           | -13918.4 | -13650.3 | 5.3   | 0.021   | Year Gear Target<br>Quarter Vessel <i>Year ×<br/>Quarter</i>                 | 31436.4 | 31520.4 | 31788.3 | 37.6  | < 0.001                           | Year Area Depth<br>Month Moon Soak<br>time <i>Year × Month</i>                                                  | 338.7    | 446.66  | 678.5   | 1.90  | 0.168   |
| Year Vessel Métier<br>Quarter <i>Year ×<br/>Quarter Year ×<br/>Vessel</i>                     | -14078.6                                           | -13974.6 | -13701.3 | 58.3  | < 0.001 | Year Gear Target<br>Quarter Vessel <i>Year ×<br/>Quarter Year × Vessel *</i> | 31288.4 | 31374.4 | 31648.7 | 148.0 | < 0.001                           | Year Area Depth<br>Month Moon Soak<br>time <i>Year × Month<br/>Year × Moon</i>                                  | 336.1    | 446.14  | 682.3   | 2.51  | 0.113   |
| Year Vessel Métier<br>Quarter <i>Year ×<br/>Quarter Year ×<br/>Vessel Year × Métier<br/>*</i> | -14326.8                                           | -14220.8 | -13942.2 | 248.2 | < 0.001 |                                                                              |         |         |         |       |                                   | Year Area Depth<br>Month Moon Soak<br>time <i>Year × Month<br/>Year × Moon Year ×<br/>Area*</i>                 | 314.978  | 426.98  | 667.4   | 21.16 | < 0.001 |
|                                                                                               |                                                    |          |          |       |         |                                                                              |         |         |         |       |                                   | Year Area Depth<br>Month Moon Soak<br>time <i>Year × Month<br/>Year × Moon Year ×<br/>Area Year × Soak time</i> | 314.2987 | 428.30  | 673.0   | 0.68  | 0.410   |
|                                                                                               | BRF                                                |          |          |       |         |                                                                              | BRF     |         |         |       |                                   |                                                                                                                 | BRF      |         |         |       |         |
| Binomial<br>(proportion of<br>positive catches)                                               |                                                    |          |          |       |         | Binomial (proportion<br>of positive catches)                                 |         |         |         |       |                                   | Binomial<br>(proportion of<br>positive catches)                                                                 |          |         |         |       |         |
| Year Métier Vessel                                                                            | 2654.9                                             | 2748.9   | 3045.0   |       |         | Year Gear Target *                                                           | 23316.2 | 23384.2 | 23668.3 |       |                                   | Year Depth Soak<br>time*                                                                                        | 6569.9   | 6665.9  | 6991.0  |       |         |
| Year Métier Vessel<br><i>Year × Vessel</i>                                                    | 2653.6                                             | 2749.6   | 3052.0   | 1.32  | 0.251   | Year Gear Target <i>Year<br/>× Target</i>                                    | 23316.2 | 23386.2 | 23678.7 | 0.0   | 0.993                             | Year Depth Soak<br>time <i>Year × Soak time</i>                                                                 | 6569.9   | 6667.9  | 6999.8  | 0.0   | 0.997   |
| Year Métier Vessel<br><i>Year × Vessel Year ×<br/>Métier *</i>                                | 2565.4                                             | 2663.4   | 2972.1   | 88.2  | < 0.001 |                                                                              |         |         |         |       |                                   |                                                                                                                 |          |         |         |       |         |
| Gamma (positive<br>catches)                                                                   |                                                    |          |          |       |         | Gamma (positive<br>catches)                                                  |         |         |         |       |                                   | Gamma (positive<br>catches)                                                                                     |          |         |         |       |         |
| Year Quarter<br>Vessel *                                                                      | -10880.8                                           | -10794.8 | -10561.4 |       |         | Year Vessel Gear<br>Target                                                   | 75262.2 | 75340.2 | 75617.7 |       |                                   | Year Area Depth                                                                                                 | 12383.8  | 12481.8 | 12784.3 |       |         |

|                                                                      |         |         |         |      |         | Year Vessel Gear<br>Target Year $\times$ Gear *                             | 74699.2 | 74779.2 | 75063.9 | 562.9 | < 0.001 | Year Area Depth<br>Year $\times$ Area *                                                         | 12256.9 | 12356.9 | 12665.6 | 126.9 | < 0.001 |
|----------------------------------------------------------------------|---------|---------|---------|------|---------|-----------------------------------------------------------------------------|---------|---------|---------|-------|---------|-------------------------------------------------------------------------------------------------|---------|---------|---------|-------|---------|
|                                                                      | RIB     |         |         |      |         |                                                                             | RIB     |         |         |       |         |                                                                                                 | RIB     |         |         |       |         |
| Binomial<br>(proportion of<br>positive catches)                      |         |         |         |      |         | Binomial (proportion<br>of positive catches)                                |         |         |         |       |         | Binomial<br>(proportion of<br>positive catches)                                                 |         |         |         |       |         |
| Year Métier Vessel                                                   | 1060.1  | 1154.1  | 1450.2  |      |         | Year Vessel Gear<br>Depth Target *                                          | 6583.2  | 6663.2  | 6993.6  |       |         | Year Depth Area                                                                                 | 4296.9  | 4398.9  | 4759.0  |       |         |
| Year Métier Vessel<br>Year $\times$ Vessel                           | 1057.5  | 1153.5  | 1455.9  | 2.54 | 0.111   |                                                                             |         |         |         |       |         | Year Depth Area<br>Year $\times$ Area *                                                         | 4117.7  | 4221.7  | 4588.9  | 179.2 | < 0.001 |
| Year Métier Vessel<br>Year $\times$ Vessel Year $\times$<br>Métier * | 1002.7  | 1100.7  | 1409.4  | 54.9 | < 0.001 |                                                                             |         |         |         |       |         |                                                                                                 |         |         |         |       |         |
| Gamma (positive<br>catches)                                          |         |         |         |      |         | Gamma (positive<br>catches)                                                 |         |         |         |       |         | Gamma (positive<br>catches)                                                                     |         |         |         |       |         |
| Year Vessel Métier                                                   | -5129.4 | -5055.4 | -4896.3 |      |         | Year Depth Target<br>Quarter Vessel                                         | 15028.8 | 15104.8 | 15313.1 |       |         | Year Area Depth<br>Month Moon                                                                   | 6555.0  | 6663.0  | 6954.1  |       |         |
|                                                                      |         |         |         |      |         |                                                                             |         |         |         |       |         | Year Area Depth<br>Month Moon Year $\times$<br>Month                                            | 6549.5  | 6659.5  | 6956.0  | 5.5   | 0.019   |
| Year Vessel Métier<br>Year $\times$ Vessel                           | -5134.5 | -5058.5 | -4895.0 | 5.0  | 0.024   | Year Depth Target<br>Vessel Year $\times$ Quarter                           | 15029.6 | 15107.6 | 15321.4 | 0.8   | 0.380   | Year Area Depth<br>Month Moon Year $\times$<br>Month Year $\times$ Moon                         | 6507.9  | 6619.9  | 6921.8  | 41.6  | < 0.001 |
| Year Vessel Métier<br>Year $\times$ Vessel Year $\times$<br>Métier * | -5156.5 | -5078.5 | -4910.8 | 22.0 | < 0.001 | Year Depth Target<br>Vessel Year $\times$ Quarter<br>Year $\times$ Vessel * | 14999.0 | 15079.0 | 15298.3 | 30.6  | < 0.001 | Year Area Depth<br>Month Moon Year $\times$<br>Month Year $\times$ Moon<br>Year $\times$ Area * | 6447.1  | 6561.1  | 6868.5  | 60.8  | < 0.001 |

The factors in normal typeface are treated as fixed effects and those in italics are random interactions.

\* the best fitted model.
