# Supplementary material
Source: MDPI journal article supplement (https://www.mdpi.com/2673-3951/3/1/1)
Supplement: s1 [file s1]

## Article

# Error Distribution Model to Standardize LPUE, CPUE and Survey-Derived Catch Rates of Target and Non-Target Species

Régis Santos<sup>1,2\*</sup>, Osman Crespo<sup>1,2</sup>, Wendell Medeiros-Leal<sup>1,2</sup>, Ana Novoa-Pabon<sup>1</sup> and Mário Pinho<sup>1,2</sup>

<sup>1</sup>Oceanos-UAc Instituto de Investigação em Ciências do Mar, Universidade dos Açores. Rua Prof. Dr. Frederico Machado, 4, 9900-138 – Horta, Faial, Portugal.

<sup>2</sup>IMAR Instituto do Mar, Departamento de Oceanografia e Pescas, Universidade dos Açores. Rua Prof. Dr. Frederico Machado, 4, 9901-862 – Horta, Faial, Portugal.

\* Correspondence: regisvinicius@gmail.com, Tel. (+351) 292 200 469

**Table S1.** Deviance analysis table of explanatory variables for GLM formulations for thornback ray *Raja clavate* (RJC), blackbelly rosefish *Helicolenus dactylopterus* (BRF), and common mora *Mora moro* (RIB) catch rates (LPUE; kg landing<sup>-1</sup> vessel<sup>-1</sup>) from the Azorean commercial fishery. Significant ( $P < 0.05$ ) factors and interaction that accounted for 5% or more of the variability are in bold.

|                                                  | RJC  |         |        |             |         | BRF  |         |         |             |         | RIB  |         |         |             |         |
|--------------------------------------------------|------|---------|--------|-------------|---------|------|---------|---------|-------------|---------|------|---------|---------|-------------|---------|
|                                                  | d.f. | Res Dev | Δ Dev. | % Dev.      | p-value | d.f. | Res Dev | Δ Dev.  | % Dev.      | p-value | d.f. | Res Dev | Δ Dev.  | % Dev.      | p-value |
| <b>Gamma (LPUE + c)</b>                          |      |         |        |             |         |      |         |         |             |         |      |         |         |             |         |
| Null                                             |      | 12056.2 |        |             |         |      | 17216.2 |         |             |         |      | 17843.0 |         |             |         |
| Year                                             | 32   | 10074.1 | 1982.2 | <b>19.6</b> | < 0.001 | 32   | 18795.3 | 0.0     | 0.0         | 1.000   | 32   | 21249.4 | 0.0     | 0.0         | < 0.001 |
| Year Quarter                                     | 3    | 10045.9 | 28.2   | 0.3         | < 0.001 | 3    | 18896.1 | 0.0     | 0.0         | 1.000   | 3    | 9577.5  | 11671.9 | <b>59.2</b> | < 0.001 |
| Year Quarter Vessel                              | 4    | 6132.7  | 3913.2 | <b>38.7</b> | < 0.001 | 4    | 3859.9  | 15036.2 | <b>86.5</b> | < 0.001 | 4    | 6460.0  | 3117.5  | <b>15.8</b> | < 0.001 |
| Year Quarter Vessel Métier                       | 10   | 3912.2  | 2220.5 | <b>21.9</b> | < 0.001 | 10   | 3364.0  | 496.0   | 2.9         | < 0.001 | 10   | 5156.6  | 1303.4  | <b>6.6</b>  | < 0.001 |
| Year Quarter Vessel Métier Target                | 1    | 3792.6  | 119.6  | 1.2         | < 0.001 | 3    | 2808.9  | 555.0   | 3.2         | < 0.001 | 3    | 4819.4  | 337.2   | 1.7         | < 0.001 |
| Year Quarter Vessel Métier Target Year × Quarter | 96   | 3164.4  | 628.2  | <b>6.2</b>  | < 0.001 | 96   | 2632    | 176.9   | 1.0         | < 0.001 | 96   | 3995.0  | 824.4   | 4.2         | < 0.001 |

|                                                                                            | RJC  |         |        |             |         | BRF  |         |        |             |         | RIB  |         |        |             |         |
|--------------------------------------------------------------------------------------------|------|---------|--------|-------------|---------|------|---------|--------|-------------|---------|------|---------|--------|-------------|---------|
|                                                                                            | d.f. | Res Dev | Δ Dev. | % Dev.      | p-value | d.f. | Res Dev | Δ Dev. | % Dev.      | p-value | d.f. | Res Dev | Δ Dev. | % Dev.      | p-value |
| Year Quarter Vessel Métier Target Year × Quarter Year × Vessel                             | 127  | 2521.6  | 642.8  | <b>6.4</b>  | < 0.001 | 127  | 1932.4  | 699.6  | 4.0         | < 0.001 | 127  | 2336.0  | 1659.0 | <b>8.4</b>  | < 0.001 |
| Year Quarter Vessel Métier Target Year × Quarter Year × Vessel Year × Métier               | 294  | 1935.8  | 585.8  | <b>5.8</b>  | < 0.001 | 294  | 1558.9  | 373.5  | 2.1         | < 0.001 | 294  | 1540.4  | 795.6  | 4.0         | < 0.001 |
| Year Quarter Vessel Métier Target Year × Quarter Year × Vessel Year × Métier Year × Target | 0    | 1935.8  | 0.0    | 0.0         |         | 28   | 1513.7  | 45.2   | 0.3         | < 0.001 | 0    | 1540.4  | 0.0    | 0.0         |         |
| <b>Gamma (LPUE + 1)</b>                                                                    |      |         |        |             |         |      |         |        |             |         |      |         |        |             |         |
| Null                                                                                       |      | 7.0     |        |             |         |      | 1563.0  |        |             |         |      | 49.9    |        |             |         |
| Year                                                                                       | 32   | 6.9     | 0.1    | 2.9         | < 0.001 | 32   | 1040.0  | 523    | <b>37.8</b> | < 0.001 | 32   | 46.9    | 2.9    | <b>8.1</b>  | < 0.001 |
| Year Quarter                                                                               | 3    | 6.9     | 0.0    | 0.1         | 0.495   | 3    | 1039.8  | 0.2    | 0           | 0.606   | 3    | 46.8    | 0.2    | 0.5         | < 0.001 |
| Year Quarter Vessel                                                                        | 4    | 6.6     | 0.3    | <b>6.8</b>  | < 0.001 | 4    | 671.1   | 368.7  | <b>26.6</b> | < 0.001 | 4    | 43.9    | 2.9    | <b>8.0</b>  | < 0.001 |
| Year Quarter Vessel Métier                                                                 | 10   | 6.3     | 0.3    | <b>6.5</b>  | < 0.001 | 10   | 618.8   | 52.3   | 3.8         | < 0.001 | 10   | 42.5    | 1.4    | 3.9         | < 0.001 |
| Year Quarter Vessel Métier Target                                                          | 1    | 5.9     | 0.4    | <b>9.2</b>  | < 0.001 | 3    | 413.5   | 205.3  | <b>14.8</b> | < 0.001 | 3    | 24.0    | 18.5   | <b>51.4</b> | < 0.001 |
| Year Quarter Vessel Métier Target Year × Quarter                                           | 96   | 5.7     | 0.2    | <b>5.2</b>  | < 0.001 | 96   | 379.9   | 33.6   | 2.4         | < 0.001 | 96   | 22.8    | 1.2    | 3.5         | < 0.001 |
| Year Quarter Vessel Métier Target Year × Quarter Year × Vessel                             | 127  | 3.1     | 2.6    | <b>63.7</b> | < 0.001 | 127  | 231.2   | 148.7  | <b>10.7</b> | < 0.001 | 127  | 15.6    | 7.2    | <b>20.0</b> | < 0.001 |
| Year Quarter Vessel Métier Target Year × Quarter Year × Vessel Year × Métier               | 294  | 2.8     | 0.2    | <b>5.6</b>  | 0.997   | 294  | 193.2   | 38.0   | 2.7         | < 0.001 | 294  | 13.9    | 1.6    | 4.6         | 0.600   |
| Year Quarter Vessel Métier Target Year × Quarter Year × Vessel Year × Métier Year × Target | 0    | 2.8     | 0.0    | 0.0         |         | 28   | 178.4   | 14.8   | 1.1         | < 0.001 | 0    | 13.9    | 0.0    | 0.0         |         |
| <b>Lognormal (LPUE + c)</b>                                                                |      |         |        |             |         |      |         |        |             |         |      |         |        |             |         |
| Null                                                                                       |      | 4167.6  |        |             |         |      | 4330.4  |        |             |         |      | 2834.6  |        |             |         |
| Year                                                                                       | 32   | 4109.4  | 58.2   | 2.2         | < 0.001 | 32   | 4127.2  | 203.2  | <b>6.9</b>  | < 0.001 | 32   | 2708.4  | 126.1  | <b>8.0</b>  | < 0.001 |
| Year Quarter                                                                               | 3    | 4086.9  | 22.5   | 0.9         | < 0.001 | 3    | 4125.6  | 1.6    | 0.1         | 0.276   | 3    | 2704.2  | 4.3    | 0.3         | 0.009   |
| Year Quarter Vessel                                                                        | 4    | 3779.5  | 307.4  | <b>11.7</b> | < 0.001 | 4    | 3165.2  | 960.4  | <b>32.7</b> | < 0.001 | 4    | 2518.3  | 185.9  | <b>11.9</b> | < 0.001 |
| Year Quarter Vessel Métier                                                                 | 10   | 2053.8  | 1725.7 | <b>65.5</b> | < 0.001 | 10   | 2382.2  | 783.0  | <b>26.7</b> | < 0.001 | 10   | 2131.2  | 387.1  | <b>24.7</b> | < 0.001 |
| Year Quarter Vessel Métier Target                                                          | 1    | 2021.5  | 32.3   | 1.2         | < 0.001 | 3    | 1858.2  | 523.9  | <b>17.8</b> | < 0.001 | 3    | 1985.8  | 145.4  | <b>9.3</b>  | < 0.001 |
| Year Quarter Vessel Métier Target Year × Quarter                                           | 96   | 1990.0  | 31.5   | 1.2         | 0.974   | 96   | 1833.0  | 25.2   | 0.9         | 0.997   | 96   | 1965.0  | 20.8   | 1.3         | 1.000   |

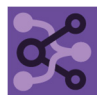

|                                                                                            | RJC  |         |        |             |         | BRF  |         |        |             |         | RIB  |         |        |             |         |
|--------------------------------------------------------------------------------------------|------|---------|--------|-------------|---------|------|---------|--------|-------------|---------|------|---------|--------|-------------|---------|
|                                                                                            | d.f. | Res Dev | Δ Dev. | % Dev.      | p-value | d.f. | Res Dev | Δ Dev. | % Dev.      | p-value | d.f. | Res Dev | Δ Dev. | % Dev.      | p-value |
| Year Quarter Vessel Métier Target Year × Quarter Year × Vessel                             | 127  | 1766.3  | 223.7  | <b>8.5</b>  | < 0.001 | 127  | 1638.3  | 194.7  | <b>6.6</b>  | < 0.001 | 127  | 1641.7  | 323.3  | <b>20.6</b> | < 0.001 |
| Year Quarter Vessel Métier Target Year × Quarter Year × Vessel Year × Métier               | 294  | 1534.3  | 232.1  | <b>8.8</b>  | < 0.001 | 294  | 1431.1  | 207.2  | <b>7.1</b>  | < 0.001 | 294  | 1266.2  | 375.5  | <b>23.9</b> | < 0.001 |
| Year Quarter Vessel Métier Target Year × Quarter Year × Vessel Year × Métier Year × Target | 0    | 1534.3  | 0.0    | 0.0         |         | 28   | 1395.0  | 36.0   | 1.2         | < 0.001 | 0    | 1266.2  | 0.0    | 0.0         |         |
| <b>Lognormal (LPUE + 1)</b>                                                                |      |         |        |             |         |      |         |        |             |         |      |         |        |             |         |
| Null                                                                                       |      | 5.4     |        |             |         |      | 408.7   |        |             |         |      | 28.5    |        |             |         |
| Year                                                                                       | 32   | 5.3     | 0.1    | 2.1         | < 0.001 | 32   | 394.8   | 13.9   | <b>5.2</b>  | < 0.001 | 32   | 27.9    | 0.6    | 3.4         | < 0.001 |
| Year Quarter                                                                               | 3    | 5.3     | 0.0    | 0.0         | 0.959   | 3    | 394.6   | 0.2    | 0.1         | 0.149   | 3    | 27.8    | 0.1    | 0.3         | 0.002   |
| Year Quarter Vessel                                                                        | 4    | 5.1     | 0.2    | <b>6.8</b>  | < 0.001 | 4    | 325.3   | 69.3   | <b>25.9</b> | < 0.001 | 4    | 27.0    | 0.8    | <b>5.0</b>  | < 0.001 |
| Year Quarter Vessel Métier                                                                 | 10   | 4.9     | 0.2    | <b>7.3</b>  | < 0.001 | 10   | 299.9   | 25.4   | <b>9.5</b>  | < 0.001 | 10   | 26.4    | 0.6    | 3.5         | < 0.001 |
| Year Quarter Vessel Métier Target                                                          | 1    | 4.6     | 0.3    | <b>11.3</b> | < 0.001 | 3    | 205.5   | 94.4   | <b>35.3</b> | < 0.001 | 3    | 16.5    | 9.9    | <b>59.7</b> | < 0.001 |
| Year Quarter Vessel Métier Target Year × Quarter                                           | 96   | 4.5     | 0.1    | 3.3         | 0.021   | 96   | 203.0   | 2.5    | 0.9         | 0.998   | 96   | 16.2    | 0.3    | 2.0         | 0.419   |
| Year Quarter Vessel Métier Target Year × Quarter Year × Vessel                             | 127  | 2.7     | 1.8    | <b>63.6</b> | < 0.001 | 127  | 171.3   | 31.7   | <b>11.8</b> | < 0.001 | 127  | 12.8    | 3.3    | <b>20.0</b> | < 0.001 |
| Year Quarter Vessel Métier Target Year × Quarter Year × Vessel Year × Métier               | 294  | 2.6     | 0.2    | <b>5.7</b>  | < 0.001 | 294  | 152.0   | 19.3   | <b>7.2</b>  | < 0.001 | 294  | 11.8    | 1.0    | 6.2         | 0.348   |
| Year Quarter Vessel Métier Target Year × Quarter Year × Vessel Year × Métier Year × Target | 0    | 2.6     | 0.0    | 0.0         |         | 28   | 141.0   | 11.0   | 4.1         | < 0.001 | 0    | 11.8    | 0.0    | 0.0         |         |
| <b>Tweedie</b>                                                                             |      |         |        |             |         |      |         |        |             |         |      |         |        |             |         |
| Null                                                                                       |      | 683.3   |        |             |         |      | 23724.1 |        |             |         |      | 1366.8  |        |             |         |
| Year                                                                                       | 32   | 594.2   | 89.2   | <b>14.8</b> | < 0.001 | 32   | 18026.9 | 5697.2 | <b>27.6</b> | < 0.001 | 32   | 858.4   | 508.4  | <b>38.8</b> | < 0.001 |
| Year Quarter                                                                               | 3    | 593.5   | 0.7    | 0.1         | < 0.001 | 3    | 17989.6 | 37.3   | 0.2         | < 0.001 | 3    | 810.7   | 47.7   | 3.6         | < 0.001 |
| Year Quarter Vessel                                                                        | 4    | 398.2   | 195.3  | <b>32.5</b> | < 0.001 | 4    | 8929.3  | 9060.3 | <b>43.8</b> | < 0.001 | 4    | 419.6   | 391.1  | <b>29.8</b> | < 0.001 |
| Year Quarter Vessel Métier                                                                 | 10   | 244.5   | 153.7  | <b>25.6</b> | < 0.001 | 10   | 6304.2  | 2625.1 | <b>12.7</b> | < 0.001 | 10   | 198.3   | 221.3  | <b>16.9</b> | < 0.001 |
| Year Quarter Vessel Métier Target                                                          | 1    | 235.3   | 9.2    | 1.5         | < 0.001 | 3    | 5968.6  | 335.6  | 1.6         | < 0.001 | 3    | 187.1   | 11.2   | 0.9         | < 0.001 |
| Year Quarter Vessel Métier Target Year × Quarter                                           | 96   | 186.0   | 49.2   | <b>8.2</b>  | < 0.001 | 96   | 5469.4  | 499.2  | 2.4         | < 0.001 | 96   | 155.6   | 31.5   | 2.4         | < 0.001 |

|                                                                                            | RJC  |         |        |             |         | BRF  |         |         |             |         | RIB  |         |        |             |         |
|--------------------------------------------------------------------------------------------|------|---------|--------|-------------|---------|------|---------|---------|-------------|---------|------|---------|--------|-------------|---------|
|                                                                                            | d.f. | Res Dev | Δ Dev. | % Dev.      | p-value | d.f. | Res Dev | Δ Dev.  | % Dev.      | p-value | d.f. | Res Dev | Δ Dev. | % Dev.      | p-value |
| Year Quarter Vessel Métier Target Year × Quarter Year × Vessel                             | 127  | 135.6   | 50.5   | <b>8.4</b>  | < 0.001 | 127  | 4788.7  | 680.8   | 3.3         | < 0.001 | 127  | 95.5    | 60.1   | <b>4.6</b>  | < 0.001 |
| Year Quarter Vessel Métier Target Year × Quarter Year × Vessel Year × Métier               | 294  | 82.4    | 53.2   | <b>8.9</b>  | < 0.001 | 293  | 3115.9  | 1672.8  | <b>8.1</b>  | < 0.001 | 294  | 54.9    | 40.6   | 3.1         | < 0.001 |
| Year Quarter Vessel Métier Target Year × Quarter Year × Vessel Year × Métier Year × Target | 0    | 82.4    | 0.0    | 0.0         |         | 28   | 3058.1  | 57.8    | 0.3         | < 0.001 | 0    | 54.9    | 0.0    | 0.0         |         |
| <b>Binomial (proportion of positive catches)</b>                                           |      |         |        |             |         |      |         |         |             |         |      |         |        |             |         |
| Null                                                                                       |      | 5222.4  |        |             |         |      | 5447.5  |         |             |         |      | 3191.8  |        |             |         |
| Year                                                                                       | 32   | 5193.8  | 28.6   | 0.8         | 0.639   | 32   | 5385.7  | 61.8    | 1.7         | 0.001   | 32   | 2729.5  | 462.3  | <b>17.2</b> | < 0.001 |
| Year Quarter                                                                               | 3    | 5170.8  | 23.1   | 0.7         | < 0.001 | 3    | 5383.2  | 2.5     | 0.1         | 0.471   | 3    | 2729.4  | 0.2    | 0.0         | 0.984   |
| Year Quarter Vessel                                                                        | 4    | 5120.7  | 50.0   | 1.4         | < 0.001 | 4    | 5355.8  | 27.4    | 0.7         | < 0.001 | 4    | 2716.9  | 12.4   | 0.5         | 0.014   |
| Year Quarter Vessel Métier                                                                 | 10   | 2100.5  | 3020.3 | <b>86.0</b> | < 0.001 | 10   | 2650.2  | 2705.6  | <b>73.7</b> | < 0.001 | 10   | 1051.7  | 1665.2 | <b>61.9</b> | < 0.001 |
| Year Quarter Vessel Métier Target                                                          | 1    | 2097.7  | 2.7    | 0.1         | 0.100   | 3    | 2643.0  | 7.2     | 0.2         | 0.065   | 3    | 1051.2  | 0.5    | 0.0         | 0.917   |
| Year Quarter Vessel Métier Target Year × Quarter                                           | 96   | 2012.6  | 85.1   | 2.4         | 0.778   | 96   | 2573.8  | 69.2    | 1.9         | 0.982   | 96   | 980.3   | 70.9   | 2.6         | 0.974   |
| Year Quarter Vessel Métier Target Year × Quarter Year × Vessel                             | 127  | 1711.4  | 301.2  | <b>8.6</b>  | < 0.001 | 127  | 2315.2  | 258.6   | <b>7.0</b>  | < 0.001 | 127  | 812.1   | 168.2  | <b>6.2</b>  | 0.008   |
| Year Quarter Vessel Métier Target Year × Quarter Year × Vessel Year × Métier               | 294  | 26023.5 | 0.0    | 0.0         | 1.000   | 294  | 1775.5  | 539.7   | <b>14.7</b> | < 0.001 | 294  | 500.4   | 311.8  | <b>11.6</b> | 0.228   |
| Year Quarter Vessel Métier Target Year × Quarter Year × Vessel Year × Métier Year × Target | 0    | 26023.5 | 0.0    | 0.0         |         | 28   | 1775.5  | 0.0     | 0.0         | 1.000   | 0    | 500.4   | 0.0    | 0.0         |         |
| <b>Gamma (positive catches)</b>                                                            |      |         |        |             |         |      |         |         |             |         |      |         |        |             |         |
| Null                                                                                       |      | 7314.1  |        |             |         |      | 22245.6 |         |             |         |      | 4741.9  |        |             |         |
| Year                                                                                       | 32   | 6320.4  | 993.7  | <b>15.8</b> | < 0.001 | 32   | 19658.8 | 2586.9  | <b>12.4</b> | < 0.001 | 22   | 4348.0  | 393.9  | <b>12.9</b> | < 0.001 |
| Year Quarter                                                                               | 3    | 6300.0  | 20.4   | 0.3         | < 0.001 | 3    | 19621.7 | 37.1    | 0.2         | < 0.001 | 3    | 4322.9  | 25.1   | 0.8         | < 0.001 |
| Year Quarter Vessel                                                                        | 4    | 3151.7  | 3148.3 | <b>49.9</b> | < 0.001 | 4    | 5891.3  | 13730.3 | <b>66.0</b> | < 0.001 | 4    | 2897.4  | 1425.4 | <b>46.5</b> | < 0.001 |
| Year Quarter Vessel Métier                                                                 | 9    | 2246.0  | 905.7  | <b>14.4</b> | < 0.001 | 10   | 2761.5  | 3129.8  | <b>15.0</b> | < 0.001 | 7    | 2305.1  | 592.3  | <b>19.3</b> | < 0.001 |
| Year Quarter Vessel Métier Target                                                          | 1    | 2220.3  | 25.7   | 0.4         | < 0.001 | 3    | 2626.4  | 135.1   | 0.6         | < 0.001 | 3    | 2300.9  | 4.2    | 0.1         | 0.240   |
| Year Quarter Vessel Métier Target Year × Quarter                                           | 96   | 1914.5  | 305.8  | <b>4.9</b>  | < 0.001 | 96   | 2471.7  | 154.7   | 0.7         | 0.032   | 63   | 2206.6  | 94.4   | 3.1         | 0.006   |

c: 10% of the mean catch rate; d.f.: degrees of freedom; Res. Dev.: residual deviance;  $\Delta$  Dev.: change in deviance; % Dev.: percent of deviance explained;  $p$ -value: based on chi-squared ( $\chi^2$ ) distribution and used to determine the explanatory variables that contributed significantly ( $p < 0.05$ ) to the deviance explained.
