# Supplementary material
Source: MDPI journal article supplement (https://www.mdpi.com/2673-3951/3/1/1)
Supplement: s1 [file s1]

Article

# Error Distribution Model to Standardize LPUE, CPUE and Survey-Derived Catch Rates of Target and Non-Target Species

Régis Santos<sup>1,2\*</sup>, Osman Crespo<sup>1,2</sup>, Wendell Medeiros-Leal<sup>1,2</sup>, Ana Novoa-Pabon<sup>1</sup> and Mário Pinho<sup>1,2</sup>

<sup>1</sup>Oceanos-UAc Instituto de Investigação em Ciências do Mar, Universidade dos Açores. Rua Prof. Dr. Frederico Machado, 4, 9900-138 – Horta, Faial, Portugal.

<sup>2</sup>IMAR Instituto do Mar, Departamento de Oceanografia e Pescas, Universidade dos Açores. Rua Prof. Dr. Frederico Machado, 4, 9901-862 – Horta, Faial, Portugal.

\* Correspondence: regisvinicius@gmail.com, Tel. (+351) 292 200 469

**Table S5.** Nominal and standardized LPUE (kg landing<sup>-1</sup> vessel<sup>-1</sup>), CPUE (kg days at sea<sup>-1</sup> vessel<sup>-1</sup>) and RPN (ind. 10<sup>-3</sup> hooks) estimates for thornback ray *Raja clavata* (RJC), blackbelly rosefish *Helicolenus dactylopterus* (BRF), and common mora *Mora moro* (RIB) in the Azorean region. LCI and UCI indicate estimated 95% confidence limits. Standardization process was based on the best error distribution. The values are scaled to mean.

| Year | LPUE    |              |       |      | CPUE    |              |      |      | RPN     |              |     |     |
|------|---------|--------------|-------|------|---------|--------------|------|------|---------|--------------|-----|-----|
|      | Nominal | Standardized | LCI   | UCI  | Nominal | Standardized | LCI  | UCI  | Nominal | Standardized | LCI | UCI |
| RJC  |         |              |       |      |         |              |      |      |         |              |     |     |
| 1985 | 0.12    | 0.22         | -0.63 | 1.07 |         |              |      |      |         |              |     |     |
| 1986 | 0.46    | 0.28         | -0.75 | 1.31 |         |              |      |      |         |              |     |     |
| 1987 | 0.34    | 0.47         | -1.26 | 2.20 |         |              |      |      |         |              |     |     |
| 1988 | 0.53    | 0.52         | -1.46 | 2.51 |         |              |      |      |         |              |     |     |
| 1989 | 0.53    | 0.27         | -0.70 | 1.24 |         |              |      |      |         |              |     |     |
| 1990 | 0.56    | 0.51         | -1.39 | 2.41 |         |              |      |      |         |              |     |     |
| 1991 | 0.33    | 1.11         | -3.28 | 5.49 | 0.12    | 0.58         | 0.30 | 0.86 |         |              |     |     |
| 1992 | 3.95    | 0.71         | -2.09 | 3.51 |         |              |      |      |         |              |     |     |
| 1993 | 0.13    | 0.18         | -0.51 | 0.88 | 0.54    | 1.21         | 1.00 | 1.41 |         |              |     |     |
| 1994 | 0.22    | 0.19         | -0.48 | 0.85 | 0.12    | 1.01         | 0.86 | 1.16 |         |              |     |     |

| Year | LPUE    |              |       |       | CPUE    |              |      |      | RPN     |              |      |      |
|------|---------|--------------|-------|-------|---------|--------------|------|------|---------|--------------|------|------|
|      | Nominal | Standardized | LCI   | UCI   | Nominal | Standardized | LCI  | UCI  | Nominal | Standardized | LCI  | UCI  |
| 1995 | 0.32    | 1.27         | -3.89 | 6.44  | 0.18    | 0.60         | 0.51 | 0.69 |         |              |      |      |
| 1996 | 0.36    | 0.67         | -2.00 | 3.33  | 0.27    | 1.09         | 0.90 | 1.28 | 0.67    | 0.61         | 0.35 | 0.87 |
| 1997 | 0.42    | 0.81         | -2.49 | 4.11  | 0.85    | 0.91         | 0.76 | 1.07 | 0.52    | 0.63         | 0.37 | 0.89 |
| 1998 | 1.12    | 2.11         | -6.45 | 10.67 | 1.29    | 1.34         | 1.15 | 1.53 |         |              |      |      |
| 1999 | 1.15    | 1.40         | -4.16 | 6.96  | 3.71    | 1.39         | 1.18 | 1.60 | 0.55    | 0.84         | 0.38 | 1.30 |
| 2000 | 6.02    | 0.82         | -2.53 | 4.18  | 2.11    | 1.19         | 1.03 | 1.35 | 0.41    | 0.44         | 0.26 | 0.61 |
| 2001 | 1.94    | 1.31         | -4.33 | 6.95  | 1.25    | 0.99         | 0.86 | 1.12 | 0.39    | 0.52         | 0.28 | 0.76 |
| 2002 | 1.85    | 1.81         | -5.74 | 9.37  | 1.00    | 1.30         | 1.16 | 1.45 | 2.09    | 1.71         | 0.98 | 2.45 |
| 2003 | 0.59    | 2.08         | -6.74 | 10.89 | 1.43    | 1.16         | 1.03 | 1.30 | 3.05    | 1.88         | 1.14 | 2.63 |
| 2004 | 0.30    | 1.08         | -3.36 | 5.52  | 1.33    | 1.25         | 1.10 | 1.39 | 1.48    | 0.82         | 0.44 | 1.20 |
| 2005 | 0.52    | 0.55         | -1.77 | 2.87  | 0.83    | 0.89         | 0.80 | 0.98 | 1.93    | 1.77         | 1.01 | 2.52 |
| 2006 | 0.97    | 0.88         | -2.86 | 4.62  | 0.57    | 0.76         | 0.69 | 0.83 |         |              |      |      |
| 2007 | 0.93    | 0.82         | -2.58 | 4.22  | 0.40    | 0.72         | 0.66 | 0.79 | 1.63    | 1.58         | 0.99 | 2.17 |
| 2008 | 0.23    | 0.74         | -2.36 | 3.84  | 0.68    | 1.10         | 0.99 | 1.20 | 0.69    | 1.16         | 0.67 | 1.64 |
| 2009 | 2.90    | 0.83         | -2.70 | 4.37  | 0.61    | 1.01         | 0.92 | 1.10 |         |              |      |      |
| 2010 | 0.31    | 0.62         | -1.75 | 3.00  | 0.65    | 0.96         | 0.88 | 1.04 | 0.60    | 0.66         | 0.40 | 0.92 |
| 2011 | 0.44    | 1.87         | -5.82 | 9.57  | 0.92    | 1.05         | 0.96 | 1.13 | 0.42    | 0.37         | 0.18 | 0.55 |
| 2012 | 0.39    | 0.91         | -2.69 | 4.50  | 1.15    | 1.07         | 0.97 | 1.17 | 0.55    | 0.48         | 0.28 | 0.68 |
| 2013 | 0.53    | 1.28         | -4.24 | 6.80  | 1.01    | 0.99         | 0.91 | 1.07 | 0.73    | 0.66         | 0.38 | 0.94 |
| 2014 | 2.37    | 1.45         | -4.90 | 7.80  | 1.61    | 1.08         | 0.97 | 1.18 |         |              |      |      |
| 2015 | 1.38    | 1.39         | -4.52 | 7.30  | 1.43    | 0.92         | 0.82 | 1.02 |         |              |      |      |
| 2016 | 0.56    | 1.42         | -4.85 | 7.68  | 1.22    | 0.83         | 0.74 | 0.92 | 0.44    | 0.77         | 0.44 | 1.09 |
| 2017 | 0.25    | 2.42         | -7.92 | 12.76 | 0.73    | 0.59         | 0.53 | 0.66 | 0.97    | 1.27         | 0.75 | 1.79 |
| 2018 |         |              |       |       |         |              |      |      | 0.82    | 0.89         | 0.53 | 1.26 |
| 2019 |         |              |       |       |         |              |      |      | 1.06    | 1.94         | 1.21 | 2.66 |
| BRF  |         |              |       |       |         |              |      |      |         |              |      |      |
| 1985 | 0.36    | 2.07         | 0.37  | 3.77  |         |              |      |      |         |              |      |      |
| 1986 | 0.68    | 1.49         | 0.18  | 2.79  |         |              |      |      |         |              |      |      |

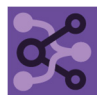

| Year | LPUE    |              |       |      | CPUE    |              |      |      | RPN     |              |         |        |
|------|---------|--------------|-------|------|---------|--------------|------|------|---------|--------------|---------|--------|
|      | Nominal | Standardized | LCI   | UCI  | Nominal | Standardized | LCI  | UCI  | Nominal | Standardized | LCI     | UCI    |
| 1987 | 7.62    | 1.70         | 0.30  | 3.10 |         |              |      |      |         |              |         |        |
| 1988 | 8.95    | 2.93         | 0.40  | 5.46 |         |              |      |      |         |              |         |        |
| 1989 | 2.80    | 3.07         | 0.52  | 5.61 |         |              |      |      |         |              |         |        |
| 1990 | 0.71    | 1.09         | 0.06  | 2.13 | 0.27    | 0.69         | 0.32 | 1.06 |         |              |         |        |
| 1991 | 0.80    | 0.87         | 0.05  | 1.68 | 7.67    | 1.77         | 1.01 | 2.52 |         |              |         |        |
| 1992 | 0.67    | 1.92         | -0.48 | 4.32 |         |              |      |      |         |              |         |        |
| 1993 | 1.07    | 0.60         | 0.02  | 1.18 | 0.72    | 1.03         | 0.93 | 1.13 |         |              |         |        |
| 1994 | 1.23    | 1.05         | 0.08  | 2.03 | 1.19    | 1.02         | 0.93 | 1.11 |         |              |         |        |
| 1995 | 0.38    | 1.65         | 0.28  | 3.01 | 1.17    | 1.13         | 1.02 | 1.24 |         |              |         |        |
| 1996 | 1.08    | 1.08         | 0.10  | 2.07 | 1.28    | 1.27         | 1.11 | 1.43 | 1.23    | 0.71         | -38.16  | 39.58  |
| 1997 | 0.67    | 0.88         | 0.04  | 1.72 | 0.77    | 1.34         | 1.21 | 1.48 | 0.58    | 0.75         | -40.26  | 41.76  |
| 1998 | 0.56    | 0.64         | 0.03  | 1.25 | 1.09    | 1.36         | 1.25 | 1.46 |         |              |         |        |
| 1999 | 1.14    | 0.77         | 0.06  | 1.49 | 1.98    | 1.81         | 1.69 | 1.93 | 1.07    | 1.54         | -81.06  | 84.14  |
| 2000 | 0.64    | 0.55         | -0.01 | 1.10 | 1.80    | 1.13         | 1.06 | 1.20 | 1.33    | 0.86         | -46.52  | 48.25  |
| 2001 | 0.26    | 0.37         | 0.01  | 0.72 | 1.03    | 1.07         | 1.00 | 1.13 | 0.93    | 0.49         | -26.49  | 27.47  |
| 2002 | 0.31    | 0.32         | 0.01  | 0.63 | 1.08    | 1.31         | 1.24 | 1.39 | 0.72    | 1.26         | -66.24  | 68.75  |
| 2003 | 0.14    | 0.69         | 0.08  | 1.30 | 0.91    | 1.08         | 1.04 | 1.13 | 1.51    | 1.56         | -83.12  | 86.23  |
| 2004 | 0.14    | 0.34         | 0.03  | 0.66 | 0.73    | 1.05         | 1.00 | 1.09 | 1.68    | 1.76         | -93.29  | 96.80  |
| 2005 | 0.09    | 0.34         | 0.03  | 0.66 | 0.52    | 1.06         | 1.01 | 1.11 | 1.67    | 3.47         | -178.23 | 185.17 |
| 2006 | 0.28    | 0.69         | 0.16  | 1.23 | 0.53    | 0.88         | 0.85 | 0.92 |         |              |         |        |
| 2007 | 0.17    | 0.58         | 0.10  | 1.06 | 0.61    | 0.89         | 0.85 | 0.93 | 1.21    | 1.02         | -54.92  | 56.96  |
| 2008 | 0.18    | 0.67         | 0.17  | 1.17 | 0.56    | 0.83         | 0.80 | 0.87 | 1.81    | 1.78         | -94.68  | 98.24  |
| 2009 | 0.12    | 1.01         | 0.29  | 1.72 | 0.47    | 0.83         | 0.79 | 0.86 |         |              |         |        |
| 2010 | 0.06    | 0.38         | 0.04  | 0.71 | 0.34    | 0.68         | 0.65 | 0.70 | 0.81    | 0.54         | -29.02  | 30.09  |
| 2011 | 0.11    | 0.34         | 0.05  | 0.63 | 0.32    | 0.74         | 0.71 | 0.77 | 0.58    | 0.46         | -25.20  | 26.13  |
| 2012 | 0.12    | 0.09         | 0.00  | 0.19 | 0.23    | 0.70         | 0.68 | 0.73 | 0.28    | 0.21         | -11.66  | 12.09  |
| 2013 | 0.09    | 0.40         | 0.07  | 0.74 | 0.28    | 0.71         | 0.69 | 0.74 | 0.41    | 0.21         | -11.69  | 12.11  |
| 2014 | 0.22    | 0.57         | 0.14  | 0.99 | 0.31    | 0.72         | 0.69 | 0.75 |         |              |         |        |

| Year | LPUE    |              |          |         | CPUE    |              |        |       | RPN     |              |         |        |
|------|---------|--------------|----------|---------|---------|--------------|--------|-------|---------|--------------|---------|--------|
|      | Nominal | Standardized | LCI      | UCI     | Nominal | Standardized | LCI    | UCI   | Nominal | Standardized | LCI     | UCI    |
| 2015 | 0.38    | 0.82         | 0.25     | 1.39    | 0.27    | 0.66         | 0.63   | 0.68  |         |              |         |        |
| 2016 | 0.32    | 0.65         | 0.15     | 1.16    | 0.33    | 0.62         | 0.59   | 0.64  | 0.59    | 0.38         | -20.75  | 21.52  |
| 2017 | 0.68    | 2.36         | 0.61     | 4.12    | 0.52    | 0.63         | 0.60   | 0.66  | 0.97    | 0.72         | -38.75  | 40.19  |
| 2018 |         |              |          |         |         |              |        |       | 0.84    | 0.62         | -33.66  | 34.90  |
| 2019 |         |              |          |         |         |              |        |       | 0.78    | 0.66         | -35.35  | 36.66  |
| RIB  |         |              |          |         |         |              |        |       |         |              |         |        |
| 1985 | 0.00    | 0.00         | -0.67    | 0.67    |         |              |        |       |         |              |         |        |
| 1986 | 0.00    | 0.00         | -0.92    | 0.92    |         |              |        |       |         |              |         |        |
| 1987 | 0.01    | 0.00         | -0.63    | 0.63    |         |              |        |       |         |              |         |        |
| 1988 | 1.01    | 0.00         | -4.58    | 4.59    |         |              |        |       |         |              |         |        |
| 1989 | 0.00    | 0.00         | -0.45    | 0.45    |         |              |        |       |         |              |         |        |
| 1990 | 0.00    | 0.00         | -2.43    | 2.43    |         |              |        |       |         |              |         |        |
| 1991 | 0.01    | 0.02         | -19.92   | 19.96   |         |              |        |       |         |              |         |        |
| 1992 | 0.99    | 0.27         | -261.71  | 262.26  |         |              |        |       |         |              |         |        |
| 1993 |         |              |          |         | 0.09    | 0.83         | 0.23   | 1.42  |         |              |         |        |
| 1994 |         |              |          |         | 0.22    | 4.73         | -14.12 | 23.58 |         |              |         |        |
| 1995 |         |              |          |         | 0.39    | 1.00         | 0.40   | 1.61  |         |              |         |        |
| 1996 |         |              |          |         | 0.76    | 1.26         | 0.76   | 1.76  | 0.66    | 0.22         | -57.80  | 58.25  |
| 1997 |         |              |          |         | 0.05    | 0.36         | -0.02  | 0.74  | 0.14    | 0.15         | -37.57  | 37.87  |
| 1998 |         |              |          |         | 0.10    | 0.72         | -0.86  | 2.30  |         |              |         |        |
| 1999 |         |              |          |         | 0.04    | 0.98         | -7.91  | 9.87  | 1.18    | 1.00         | -255.75 | 257.75 |
| 2000 |         |              |          |         | 0.25    | 1.53         | -7.23  | 10.28 | 1.21    | 1.63         | -415.23 | 418.48 |
| 2001 | 0.00    | 0.00         | -0.47    | 0.47    | 1.81    | 0.92         | -1.07  | 2.91  | 0.91    | 0.93         | -238.61 | 240.47 |
| 2002 | 3.72    | 0.53         | -503.73  | 504.78  | 2.76    | 1.84         | 1.32   | 2.36  | 1.06    | 1.03         | -263.64 | 265.70 |
| 2003 | 0.47    | 1.58         | -1511.47 | 1514.63 | 3.02    | 1.37         | 1.13   | 1.60  | 1.24    | 1.98         | -504.39 | 508.35 |
| 2004 | 0.54    | 0.93         | -887.79  | 889.64  | 1.91    | 0.82         | 0.59   | 1.05  | 1.47    | 2.29         | -583.05 | 587.62 |
| 2005 | 0.43    | 0.70         | -670.53  | 671.93  | 1.93    | 0.87         | 0.54   | 1.21  | 2.33    | 2.37         | -603.65 | 608.38 |
| 2006 | 0.49    | 1.61         | -1543.81 | 1547.03 | 1.28    | 0.76         | 0.57   | 0.94  |         |              |         |        |

| Year | LPUE    |              |           |          | CPUE    |              |       |      | RPN     |              |         |        |
|------|---------|--------------|-----------|----------|---------|--------------|-------|------|---------|--------------|---------|--------|
|      | Nominal | Standardized | LCI       | UCI      | Nominal | Standardized | LCI   | UCI  | Nominal | Standardized | LCI     | UCI    |
| 2007 | 0.60    | 0.62         | -589.34   | 590.57   | 0.81    | 0.62         | 0.37  | 0.86 | 1.20    | 1.77         | -450.63 | 454.16 |
| 2008 | 0.14    | 1.06         | -1017.25  | 1019.37  | 0.40    | 0.41         | 0.31  | 0.50 | 1.73    | 1.24         | -317.26 | 319.74 |
| 2009 | 0.20    | 1.76         | -1685.04  | 1688.56  | 0.70    | 0.47         | 0.35  | 0.58 |         |              |         |        |
| 2010 | 0.21    | 1.02         | -979.87   | 981.92   | 0.58    | 0.52         | 0.39  | 0.65 | 0.67    | 0.47         | -120.80 | 121.74 |
| 2011 | 0.56    | 0.34         | -324.82   | 325.50   | 0.73    | 0.42         | 0.25  | 0.60 | 0.29    | 0.11         | -28.75  | 28.98  |
| 2012 | 5.81    | 0.25         | -238.40   | 238.90   | 0.37    | 0.53         | -0.02 | 1.08 | 0.19    | 0.09         | -22.84  | 23.02  |
| 2013 | 1.04    | 0.28         | -266.65   | 267.21   | 0.70    | 0.73         | 0.04  | 1.42 | 0.38    | 0.15         | -39.25  | 39.55  |
| 2014 | 1.63    | 0.31         | -295.59   | 296.21   | 0.82    | 0.77         | 0.38  | 1.15 |         |              |         |        |
| 2015 | 4.71    | 2.67         | -2556.29  | 2561.62  | 0.46    | 0.69         | 0.42  | 0.97 |         |              |         |        |
| 2016 | 0.93    | 0.41         | -390.39   | 391.21   | 2.34    | 0.97         | 0.68  | 1.25 | 1.93    | 1.23         | -315.58 | 318.05 |
| 2017 | 1.45    | 10.64        | -10186.63 | 10207.92 | 2.46    | 0.90         | 0.70  | 1.10 | 0.85    | 1.34         | -342.88 | 345.57 |
| 2018 |         |              |           |          |         |              |       |      | 1.13    | 0.64         | -165.02 | 166.31 |
| 2019 |         |              |           |          |         |              |       |      | 0.44    | 0.36         | -91.92  | 92.64  |
